# Supplementary material for: Seismicity and thermal structure of the St. Paul Transform System, equatorial Atlantic: Insights from focal depth analysis
Source: Copernicus journal article supplement (doi:10.5194/egusphere-2025-1826), 2025-05-13
Supplement: Supplementary file 2 [file TableS3_Apr15.pdf › TableS3_Apr15.pdf]

**Table S3:** Parameters used in geodynamic thermal models

|                                                                                                                                                                                                                                                                                                                                            |                                                                                  |
|--------------------------------------------------------------------------------------------------------------------------------------------------------------------------------------------------------------------------------------------------------------------------------------------------------------------------------------------|----------------------------------------------------------------------------------|
| Mantle reference density                                                                                                                                                                                                                                                                                                                   | 3300 kg·m <sup>-3</sup>                                                          |
| Mantle reference temperature                                                                                                                                                                                                                                                                                                               | 1300°C                                                                           |
| Reference thermal conductivity, $k_0$                                                                                                                                                                                                                                                                                                      | 3 W·K <sup>-1</sup> ·m <sup>-1</sup>                                             |
| Thermal expansivity, $\alpha$                                                                                                                                                                                                                                                                                                              | 3×10 <sup>-5</sup> K <sup>-1</sup>                                               |
| Specific heat capacity, $C_p$                                                                                                                                                                                                                                                                                                              | 1250 J·kg <sup>-1</sup> ·K <sup>-1</sup>                                         |
| Nusselt number, Nu                                                                                                                                                                                                                                                                                                                         | 4                                                                                |
| Frictional angle, $\varphi$                                                                                                                                                                                                                                                                                                                | 30°                                                                              |
| Cohesions, $c_0$                                                                                                                                                                                                                                                                                                                           | 20 MPa                                                                           |
| Effective viscosity, $\eta_{\text{eff}}$                                                                                                                                                                                                                                                                                                   | 10 <sup>19</sup> to 10 <sup>23</sup> Pa·s                                        |
| Creep pre-exponential factor <sup>1</sup> , $B_{\text{dif}}$ ; $B_{\text{dis}}$                                                                                                                                                                                                                                                            | 2.25×10 <sup>-9</sup> ; 6.52×10 <sup>-16</sup> Pa <sup>-n</sup> ·s <sup>-1</sup> |
| Creep activation energy <sup>1</sup> , $E_{\text{dif}}$ ; $E_{\text{dis}}$                                                                                                                                                                                                                                                                 | 375; 530 kJ·mol <sup>-1</sup>                                                    |
| Creep activation volume <sup>1</sup> , $V_{\text{dif}}$ ; $V_{\text{dis}}$                                                                                                                                                                                                                                                                 | 6; 18 cm <sup>3</sup> ·mol <sup>-1</sup>                                         |
| Stress exponent <sup>1</sup> , $n_{\text{dif}}$ ; $n_{\text{dis}}$                                                                                                                                                                                                                                                                         | 0; 3                                                                             |
| Gas constant, R                                                                                                                                                                                                                                                                                                                            | 8.314 J·K <sup>-1</sup> ·mol <sup>-1</sup>                                       |
| Grain size and its exponent in diffusion creep <sup>1</sup> , d; m                                                                                                                                                                                                                                                                         | 0.001 m; 2.5                                                                     |
| Ridge half-spreading rate, $U_{\text{half}}$                                                                                                                                                                                                                                                                                               | 2.78 cm·yr <sup>-1</sup>                                                         |
| <sup>1</sup> Mantle material: Dry Olivine from Hirth, G., and Kohlstedt, D. (2003). Rheology of the upper mantle and the mantle wedge: A view from the experimentalists. Washington DC American Geophysical Union Geophysical Monograph Series, 138, 83–105. <a href="https://doi.org/10.1029/138GM06">https://doi.org/10.1029/138GM06</a> |                                                                                  |
